1 **Postmarketing commitments for novel drugs and biologics approved by the US Food and Drug**  
2 **Administration: a cross-sectional analysis**

3  
4 Joshua D Wallach<sup>1,2,3</sup>; Anita T Luxkaranayagam<sup>2,4</sup>; Sanket S Dhruva<sup>5,6</sup>; Jennifer E Miller<sup>7</sup>; Joseph S  
5 Ross<sup>2,7,8,9</sup>  
6

7 <sup>1</sup>Department of Environmental Health Sciences, Yale School of Public Health, 60 College Street, New  
8 Haven, CT, 06510, USA  
9

10 <sup>2</sup>Collaboration for Research Integrity and Transparency (CRIT), Yale University, 157 Church Street, 17<sup>th</sup>  
11 Floor, Suite 1, New Haven, CT, 06510, USA  
12

13 <sup>3</sup>Center for Outcomes Research and Evaluation (CORE), Yale-New Haven Hospital, 1 Church Street,  
14 Suite 200, New Haven, CT, 06510, USA  
15

16 <sup>4</sup>University of Connecticut, Storrs, CT, 06269, USA  
17

18 <sup>5</sup>Department of Medicine, University of California, San Francisco School of Medicine, San Francisco,  
19 USA  
20

21 <sup>6</sup>Section of Cardiology, San Francisco Veterans Affairs Health Care System, San Francisco, CA, 4150  
22 Clement St, Building 203, 2<sup>nd</sup> Floor Cardiology, San Francisco, CA, 94121, USA  
23

24 <sup>7</sup>Section of General Medicine, Department of Internal Medicine, Yale School of Medicine, P.O. Box  
25 208093, New Haven, CT, 06520-8093, USA  
26

27 <sup>8</sup>National Clinician Scholars Program, Department of Internal Medicine, Yale School of Medicine, New  
28 Haven CT, USA  
29

30 <sup>9</sup>Department of Health Policy and Management, Yale School of Public Health, 60 College Street, New  
31 Haven, CT, 06510, USA  
32

33 [Joshua.wallach@yale.edu](mailto:Joshua.wallach@yale.edu)

34 [anita.luxkaranayagam@uconn.edu](mailto:anita.luxkaranayagam@uconn.edu)

35 [Sanket.dhruva@ucsf.edu](mailto:Sanket.dhruva@ucsf.edu)

36 [Jennifer.e.miller@yale.edu](mailto:Jennifer.e.miller@yale.edu)

37 [joseph.ross@yale.edu](mailto:joseph.ross@yale.edu)  
38

39 **Corresponding author:**

40 Joshua D Wallach, MS, PhD

41 Department of Environmental Health Sciences, Yale School of Public Health

42 Collaboration for Research Integrity and Transparency (CRIT), Yale Law School

43 60 College Street, 4<sup>th</sup> Floor, Room 411, New Haven, CT, 06510, USA

44 Email: [joshua.wallach@yale.edu](mailto:joshua.wallach@yale.edu)  
45

46 **Word count:** 3295

47 **Tables/Boxes:** 4, 3

48 **References:** 32

49 **Appendix:** 1  
50  
51

52 **Abstract**

53 **Background:** Postmarketing commitments are clinical studies that drug sponsors agree to conduct at the  
54 time of FDA approval, but which are not required by statute or regulation. The objective of this study was  
55 to determine the characteristics, completion, and dissemination of postmarketing commitments agreed  
56 upon by sponsors at first FDA approval.

57 **Methods:** We performed a cross-sectional analysis of postmarketing commitments for new drugs and  
58 biologics approved 2009-2012. Using public FDA documents, ClinicalTrials.gov, and Scopus, we  
59 determined postmarketing commitments and their characteristics known at the time of FDA approval;  
60 number of postmarketing commitments subject to reporting requirements, for which FDA is required to  
61 make study status information available to the public (“506B studies”), and their statuses; and rates of  
62 registration and results reporting on ClinicalTrials.gov and publication in peer-reviewed journals for all  
63 clinical trials, with follow-up through July 2018.

64 **Results:** Among 110 novel drugs and biologics approved by the FDA between 2009-2012, 61 (55.5%)  
65 had at least one postmarketing commitment at the time of first approval. Of 331 total postmarketing  
66 commitments, 271 (81.9%) were non-human subjects research, predominantly chemistry, manufacturing,  
67 and controls studies; 49 (14.8%) were clinical trials (33 new and 16 ongoing trials for which follow-up  
68 results would be reported). Study descriptions for the new clinical trials often lacked information to  
69 establish study design features. Of the 89 (26.9%) 506B studies subject to public reporting requirements,  
70 of which 42 were clinical trials, 59 (66.3%) did not have an up-to-date status provided by FDA. Nearly all  
71 new clinical trials (28 of 31, 90.3%) were registered on ClinicalTrials.gov; of the 23 registered trials that  
72 were completed or terminated, 22 (95.7%) had reported results. Only half (14 of 29, 48.3%) of completed  
73 or terminated clinical trials, registered or unregistered, were published in peer-reviewed journals.

74 **Conclusions:** The majority of postmarketing commitments agreed to by sponsors at the time of FDA  
75 approval for novel drugs and biologics approved between 2009-2012 were chemistry, manufacturing, and  
76 controls studies. While only 15% were clinical trials, these trials were nearly always registered with

77 reported results on ClinicalTrials.gov. However, despite FDA public reporting requirements, up-to-date  
78 study status information was often unavailable for 506B studies.

79 **Key words:** Postmarketing commitments; postmarketing requirements; FDA; lifecycle evaluation;  
80 pharmaceutical regulation

81

82

83

84

85

86

87

88

89

90

91

92

93

94

95

96

97

98

99

100

101

102

## 103 **Background**

104 Under the US Food and Drug Administration’s (FDA) lifecycle evaluation process, it is assumed  
105 that the benefit-risk balance of drugs and biologics will continue to be monitored after approval.[1, 2]  
106 Although FDA currently has four authorities that can be used to require New Drug Application (NDA)  
107 sponsors (generally pharmaceutical companies) to conduct studies in the postmarket setting (i.e.,  
108 “postmarketing requirements”, **Box 1**),[3-5] additional clinical evidence, including long-term drug  
109 effectiveness data, can be generated through “postmarketing commitments”, which are “studies or clinical  
110 trials that a sponsor has agreed to conduct, but that are not required by a statute or regulations”.[5]

111 Prior to 2008, the term “postmarketing commitment” referred to all required, agreed-upon, and  
112 voluntary studies conducted by sponsors after FDA drug approval (**Box 1**).[5] Although FDA had the  
113 authority to require certain studies after approval, approximately 90% of all postmarketing studies  
114 between 1990 and 2004 were agreed-upon commitments.[6] However, once the FDA Amendments Act  
115 (FDAAA) went into effect on March 25, 2008, FDA began to distinguish between legally required studies  
116 and clinical trials (i.e., postmarketing requirements) and those that sponsors agreed to conduct but are not  
117 required (i.e., postmarketing commitments) (**Box 1**). While postmarketing commitments are not formally  
118 mandated by FDA, certain postmarketing commitments, including clinical studies, are subject to reporting  
119 requirements under section 506B (“506B studies”) of the Federal Food, Drug, and Cosmetic Act (**Box 2**).  
120 For 506B studies, sponsors must annually report to the FDA the status of postmarketing commitments,  
121 and the FDA must publicly report on the status of these commitments.[7]

122 Prior studies have focused exclusively on the characteristics,[8] completion,[9] and dissemination  
123 of postmarketing requirements,[8, 10, 11] but little is known about postmarketing commitments after the  
124 post-FDAAA changes. Given that postmarketing commitments may be a potentially important source of  
125 information about drug safety and effectiveness after market approval, we characterized the  
126 postmarketing commitments for all novel drugs and biologics approved between 2009 and 2012 using  
127 publicly available data sources, including their status and study characteristics, and for clinical trial

128 postmarketing commitments, the rates and timeliness of registration and results reporting on

129 ClinicalTrials.gov, as well as publication in peer reviewed journals.

| <b>Box 1. The history of US Food and Drug Administration’s postmarketing commitments and requirements</b>                                                                                                                                                                                                                                                                                                                                                                                                                                                                                                                                                                                                                                                                                                                                                                |                                                                                                                                                                                                                                                                                                                                                                                                                                                                                                                                                                           |
|--------------------------------------------------------------------------------------------------------------------------------------------------------------------------------------------------------------------------------------------------------------------------------------------------------------------------------------------------------------------------------------------------------------------------------------------------------------------------------------------------------------------------------------------------------------------------------------------------------------------------------------------------------------------------------------------------------------------------------------------------------------------------------------------------------------------------------------------------------------------------|---------------------------------------------------------------------------------------------------------------------------------------------------------------------------------------------------------------------------------------------------------------------------------------------------------------------------------------------------------------------------------------------------------------------------------------------------------------------------------------------------------------------------------------------------------------------------|
| <b>Before FDAAA<sup>a</sup></b>                                                                                                                                                                                                                                                                                                                                                                                                                                                                                                                                                                                                                                                                                                                                                                                                                                          | <b>After FDAAA</b>                                                                                                                                                                                                                                                                                                                                                                                                                                                                                                                                                        |
| Required, agreed upon, and voluntary studies were classified as “ <i>postmarketing commitments</i> ”                                                                                                                                                                                                                                                                                                                                                                                                                                                                                                                                                                                                                                                                                                                                                                     | Required studies were classified as “ <i>postmarketing requirements</i> ” and agreed upon and voluntary studies were classified as “ <i>postmarketing commitments</i> ”                                                                                                                                                                                                                                                                                                                                                                                                   |
| <b>Statutory or regulatory authorities used to require postmarketing studies</b>                                                                                                                                                                                                                                                                                                                                                                                                                                                                                                                                                                                                                                                                                                                                                                                         |                                                                                                                                                                                                                                                                                                                                                                                                                                                                                                                                                                           |
| <ul style="list-style-type: none"> <li>- <i>Animal Efficacy Rule</i>: Novel drugs can be approved when human efficacy studies and field trials may not be ethical and/or feasible, but FDA may require postmarket studies in humans</li> <li>- <i>Pediatric Research Equity Act</i>: FDA can approve novel drugs for use in adults without corresponding studies for the same indication in the relevant pediatric population, but FDA can include deferred pediatric studies or clinical trials as postmarketing requirements</li> <li>- <i>Accelerated Approval</i>: To expedite the approval of novel drugs that treat serious diseases and that fill unmet medical needs on the basis of surrogate or intermediate endpoints “reasonably likely” to predict clinical benefit,[12] FDA has the authority to require postmarket studies to confirm efficacy</li> </ul> | <ul style="list-style-type: none"> <li>- <i>Animal Efficacy Rule</i></li> <li>- <i>Pediatric Research Equity Act</i></li> <li>- <i>Accelerated Approval</i></li> <li>- <i>Food and Drug Administration Amendments Act (FDAAA) Section 505(o)(3)</i>: To provide additional information for novel therapeutics approved under section 505 of FDAAA or section 351 of the Public Health Services Act, FDA can require postmarket studies that assess known serious risks, signs of serious risks, or unexpected serious risks related to the use of a novel drug</li> </ul> |
| FDAAA = Food and Drug Administration Amendments Act<br><sup>a</sup> Section 901 of FDAAA went into effect on March 25, 2008                                                                                                                                                                                                                                                                                                                                                                                                                                                                                                                                                                                                                                                                                                                                              |                                                                                                                                                                                                                                                                                                                                                                                                                                                                                                                                                                           |

130

| <b>Box 2. Postmarketing commitment reporting requirements</b> |                                                                                                                                                                     |                                                                                                                                                                                                                                                                                                                                                                                                                                                                                                                                                                         |
|---------------------------------------------------------------|---------------------------------------------------------------------------------------------------------------------------------------------------------------------|-------------------------------------------------------------------------------------------------------------------------------------------------------------------------------------------------------------------------------------------------------------------------------------------------------------------------------------------------------------------------------------------------------------------------------------------------------------------------------------------------------------------------------------------------------------------------|
| <b>506B (Reports of Postmarketing Studies)</b>                | <b>Study design examples</b>                                                                                                                                        | <b>Reporting requirements[13]</b>                                                                                                                                                                                                                                                                                                                                                                                                                                                                                                                                       |
| Yes                                                           | <ul style="list-style-type: none"> <li>- clinical safety</li> <li>- clinical efficacy</li> <li>- clinical pharmacology</li> <li>- nonclinical toxicology</li> </ul> | <ul style="list-style-type: none"> <li>- Drug sponsors are required to provide FDA with annual reports on the status of the 506B studies</li> <li>- FDA must publish annually in the <i>Federal Register</i> a report on the status of postmarketing study commitments</li> </ul>                                                                                                                                                                                                                                                                                       |
| No                                                            | <ul style="list-style-type: none"> <li>- Chemistry, manufacturing, and controls (CMC)</li> <li>- Product stability studies</li> <li>- Voluntary studies</li> </ul>  | <ul style="list-style-type: none"> <li>- BLAs: Non-506B studies are not subject to reporting requirements that are described under 21 CFR 601.70</li> <li>- NDAs: Applicant is required to advise FDA on that status of non-506B studies in separate section of the NDA annual report (21 CFR 314.81(b)(2)(viii)). Voluntary commitments are not subject to 506B reporting requirements. However, 21 CFR 314.81(b)(2)(viii) requires applicants to advise the FDA on the status of voluntary commitments in a separate section of the NDA annual report.[13]</li> </ul> |

BLA = Biologics License Application; NDA = New Drug Application

<sup>a</sup> Code of Federal Regulations (CFR), Title 21, Volume 7, Biologics, 21 CFR 601.70

<sup>b</sup> Code of Federal Regulations (CFR), Title 21, Volume 5, Drugs, 21 CFR 314.81(b)(2)(vii) and (viii)

131

## 132 **METHODS**

### 133 **Study design and sample**

134 As in prior work focused on postmarketing requirements,[8] we used the publicly available  
135 Drugs@FDA database to identify and categorize all novel drug and biologic license applications  
136 (excluding generic drugs, reformulations, and combination therapies of non-novel therapeutic agents) first  
137 approved between January 1, 2009, and December 31, 2012.[14, 15] As previously described,[14] we  
138 characterized each new drug and biologic by date of approval, as a pharmacologic entity (small molecule)  
139 or biologic, and by orphan status; determined the first-approved indication for each new drug and biologic  
140 and whether applications were designated by FDA for priority review status.[16] We then used the World  
141 Health Organization's anatomic therapeutic classification system to categorize each indication and  
142 grouped each indication into one of six therapeutic areas.[17]

### 143 **Identifying Postmarketing Commitments and Postmarketing Commitments Features**

144 One author (ATL) identified all postmarketing commitments and dates that the FDA sets for  
145 important milestones (i.e., final protocol submission, trial completion, and final report submission), which  
146 are outlined in the approval letters hyperlinked in the Drugs@FDA database. These letters include a brief  
147 description of the study type and outline whether commitments are subject to certain reporting  
148 requirements (**Box 2**). In particular, section 506B of the Food, Drug, and Cosmetic Act (506B studies), 21  
149 Code of Federal Regulations (CFR) 314.81(b)(2)(vii), and CFR 601.70,[4, 7] require drug sponsors to  
150 report annually on the status of certain postmarketing commitments. Additionally, for 506B studies, the  
151 FDA must publish annually in the *Federal Register* a report on the status of postmarketing  
152 commitments.[4] We then classified each postmarketing commitment into one of four study categories  
153 about the type of study required (**Box 3**), calculated the length of each postmarketing commitment study

154 description (word count), and abstracted key study design characteristics using a previously described  
155 approach.[8]

|                                                                                                                                                                                                                                                                                                                                                                                                                                         |
|-----------------------------------------------------------------------------------------------------------------------------------------------------------------------------------------------------------------------------------------------------------------------------------------------------------------------------------------------------------------------------------------------------------------------------------------|
| <b>Box 3. Postmarketing commitment categorization</b>                                                                                                                                                                                                                                                                                                                                                                                   |
| <b><i>New clinical trials</i></b>                                                                                                                                                                                                                                                                                                                                                                                                       |
| Postmarketing commitments that outline <i>new</i> clinical trials, including randomized and non-randomized clinical trials evaluating efficacy or “efficacy and safety”. This includes “clinical trials in which the primary endpoint is related to further defining efficacy, designed to: evaluate long-term effectiveness or duration of response, evaluate efficacy using a withdrawal design, evaluate efficacy in a subgroup.”[4] |
| <b><i>Complete or submit results from ongoing clinical trials</i></b>                                                                                                                                                                                                                                                                                                                                                                   |
| Instead of requesting <i>new</i> clinical trials, these postmarketing commitments call for the completion and submission of the results from ongoing clinical trials.                                                                                                                                                                                                                                                                   |
| <b><i>Observational studies, analyze/follow-up from clinical studies, and other flexible commitments</i></b>                                                                                                                                                                                                                                                                                                                            |
| Postmarketing commitments that outline longer follow-up or new analyses of data from existing trials or studies; submission of a final report for ongoing case-control, cross-sectional, or retrospective cohort studies.                                                                                                                                                                                                               |
| <b><i>Other studies</i></b>                                                                                                                                                                                                                                                                                                                                                                                                             |
| Manufacturing, stability, and immunogenicity studies that do not have a primary safety endpoint; pharmacoepidemiologic studies; pharmacokinetic and/or pharmacodynamics trials; and chemistry, manufacturing, and controls study commitments that sponsors have agreed with the FDA to conduct (CMC commitments).                                                                                                                       |

156

### 157 **Status of Postmarket Studies**

158 We used Postmarketing Study and Clinical Trial Requirements and Commitments Database Files  
159 to determine the status (i.e., Pending, Ongoing, Delayed, Terminated, Submitted, Fulfilled, or Released.

160 **Additional file 1: supplementary Box 1**) of commitments specifically classified as subject to reporting  
161 requirements under 506B (**Box 2**).[18] We downloaded the most recent Postmarketing Study and Clinical  
162 Trial Requirements and Commitments Database file on August 2, 2018 (representing data updated by  
163 FDA as of July 24, 2018). Previous Postmarketing Study and Clinical Trial Requirements and  
164 Commitments Database Files were located using the FDA.gov Archive. When archived databases with  
165 the final statuses were unavailable, we recorded the most recent status and date for each postmarketing  
166 commitment (e.g., “last available status: *Delayed*, October 31, 2010”). We then performed additional  
167 Google searches using the terms “postmarketing requirement”, “postmarketing commitment”, “PMR”, or  
168 “PMC” in combination with the manufacturer or drug brand name to determine whether manufacturers  
169 were publicly sharing their own information about postmarketing commitments (e.g., “Pfizer PMC” or  
170 “Pfizer postmarketing commitment”). For each Google search, we screened the first 100 results. Lastly,

171 we reviewed all supplemental letters on the Drugs@FDA database to determine whether they included  
172 information regarding the fulfillment of postmarketing commitments. Abstractions were performed by  
173 one reviewer (ATL) and consistency and accuracy were verified by a second reviewer (JDW).

#### 174 **Trial Registration and Results Reporting on ClinicalTrials.gov and Peer-Reviewed Publication**

175 For all new clinical trials and all commitments that call for the completion and submission of the  
176 results from ‘ongoing’ clinical trials (**Additional file 1: supplementary Boxes 2 and 3**), we determined  
177 study registration and results reporting on ClinicalTrials.gov, as previously described.[8] If identified, for  
178 each registered clinical trial, one reviewer (JDW) abstracted study characteristics from the  
179 ClinicalTrials.gov registration. The primary outcome providing the highest level of evidence was  
180 recorded. For instance, for trials with multiple primary efficacy outcomes, we considered clinical  
181 outcomes the highest level, followed by clinical scales and surrogate markers. A third reviewer (SSD)  
182 repeated all searches for trials that were determined to be unregistered, and uncertainties were discussed  
183 with the senior investigator (JSR).

184 For all clinical trials with a *Completed* or *Terminated* status on ClinicalTrials.gov for which  
185 results reporting would be expected, we abstracted whether any study results were reported and/or  
186 corresponding articles were published. For *Completed* or *Terminated* trials without reported results, we  
187 determined whether the date of final data collection for the prespecified primary outcome measure(s)  
188 (primary completion date) was within 12 months of the follow-up date (July 2018). According to the  
189 Final Rule for Clinical Trials Registration and Results Information Submission (“Final Rule”),  
190 submission of final results information is required “not later than 1 year after the completion date.”[19]  
191 For all clinical trials without publications listed on ClinicalTrials.gov and all unregistered clinical trials  
192 classified as *Submitted*, *Fulfilled*, *Released*, or unclear (i.e., no status available) according to FDA or drug  
193 sponsor data, one reviewer (JDW) used a systematic two-step search strategy to locate publications, as  
194 has been done in prior research.[8, 20] A third reviewer (SSD) repeated all searches for postmarketing  
195 commitments that were determined to be unpublished.

#### 196 **Statistical Analysis**



197 We used descriptive statistics to characterize the new drugs and biologics and postmarketing  
 198 commitments. Analyses were performed using R (version 3.2.3; The R Project for Statistical Computing).

## 199 Results

### 200 Characteristics of New Drugs and Biologics

201 Between 2009 and 2012, FDA approved 110 new drugs and biologics for 120 indications. Of  
 202 these, 49 (44.5%) did not have any postmarketing commitments at the time of first approval. Among the  
 203 61 drugs and biologics for 68 total indications in the final sample (**Table 1**), 39 (63.9%) were drugs, 22  
 204 (36.1%) biologics; 19 (31.2%) were indicated for the treatment of cancer or hematologic disease; and 21  
 205 (34.4%) received priority review. There were 7 (11.5%) drugs and biologics that received accelerated  
 206 approval and 14 (23.0%) that were designated as orphan products.

| <b>Table 1. Characteristics of 61 new drugs and biologics approved by the US Food and Drug Administration from 2009 through 2012 with at least one postmarketing commitment</b> |                |
|---------------------------------------------------------------------------------------------------------------------------------------------------------------------------------|----------------|
| <b>Characteristic</b>                                                                                                                                                           | <b>No. (%)</b> |
| <b>Approval year</b>                                                                                                                                                            |                |
| <i>2009</i>                                                                                                                                                                     | 15 (24.6)      |
| <i>2010</i>                                                                                                                                                                     | 12 (19.7)      |
| <i>2011</i>                                                                                                                                                                     | 18 (29.5)      |
| <i>2012</i>                                                                                                                                                                     | 16 (26.2)      |
| <b>Class</b>                                                                                                                                                                    |                |
| <i>Drug</i>                                                                                                                                                                     | 39 (63.9)      |
| <i>Biologic</i>                                                                                                                                                                 | 22 (36.1)      |
| <b>Therapeutic area</b>                                                                                                                                                         |                |
| <i>Cancer and hematology</i>                                                                                                                                                    | 19 (31.2)      |
| <i>Infectious disease</i>                                                                                                                                                       | 6 (9.8)        |
| <i>Cardiovascular, diabetes, and hyperlipidemia</i>                                                                                                                             | 2 (3.3)        |
| <i>Autoimmune, musculoskeletal, and dermatology</i>                                                                                                                             | 11 (18.0)      |
| <i>Neurology and psychiatry</i>                                                                                                                                                 | 7 (11.5)       |
| <i>Other</i>                                                                                                                                                                    | 16 (26.2)      |
| <b>Priority review</b>                                                                                                                                                          |                |
| <i>Yes</i>                                                                                                                                                                      | 21 (34.4)      |
| <i>No</i>                                                                                                                                                                       | 40 (65.6)      |
| <b>Accelerated Approval</b>                                                                                                                                                     |                |
| <i>Yes</i>                                                                                                                                                                      | 7 (11.5)       |
| <i>No</i>                                                                                                                                                                       | 54 (88.5)      |

| <b>Orphan Drug Designation</b> |           |
|--------------------------------|-----------|
| <i>Yes</i>                     | 14 (23.0) |
| <i>No</i>                      | 47 (77.0) |

207

208 **Postmarketing Commitments, 2009-2012**

209 The FDA approval letters for these 61 drugs and biologics described 331 separate postmarketing  
 210 commitments. The median number of commitments per approval letter was 3 (interquartile range [IQR], 1  
 211 to 7). The majority of the postmarketing commitments (271 of 331 (81.9%)) were ‘Other studies’,  
 212 including chemistry, manufacturing, and controls (CMC) studies (**Additional file 1: supplementary box**  
 213 **3**). Of the 49 (14.8%) commitments outlining a clinical trial, 33 described new clinical trials and 16 called  
 214 for the submission of final reports or data from ongoing trials. Just over one-quarter (89 (26.9%)) of the  
 215 postmarketing commitments were subject to 506B reporting requirements (**Table 2**).

| <b>Table 2. Categories of postmarketing commitments for novel drugs and biologics approved by the US Food and Drug Administration between 2009 and 2012</b> |                                                           |                 |            |
|-------------------------------------------------------------------------------------------------------------------------------------------------------------|-----------------------------------------------------------|-----------------|------------|
|                                                                                                                                                             | No. (%)                                                   |                 |            |
|                                                                                                                                                             | Subject to reporting requirements under 506B <sup>a</sup> |                 |            |
|                                                                                                                                                             | Yes                                                       | No <sup>b</sup> | Total      |
| <b>Postmarketing Commitment Description</b>                                                                                                                 |                                                           |                 |            |
| <i>New clinical trials</i>                                                                                                                                  | 27 (30.3)                                                 | 6 (2.5)         | 33 (10.0)  |
| <i>Complete or submit results from ongoing clinical trials</i>                                                                                              | 15 (16.9)                                                 | 1 (0.4)         | 16 (4.8)   |
| <i>Observational studies, analyze/follow-up from clinical studies, and other flexible commitments</i>                                                       | 11 (12.4)                                                 | 0 (0.0)         | 11 (3.3)   |
| <i>Other studies</i>                                                                                                                                        | 36 (40.4)                                                 | 235 (97.1)      | 271 (81.9) |
| <b>Total</b>                                                                                                                                                | 89 (26.9)                                                 | 242 (73.1)      | 331        |

<sup>a</sup> Food and Drug Administration Modernization Act of 1997 added section 506B (Reports of Postmarketing Studies) that gives FDA authority to monitor progress of postmarketing studies that applicants have agreed to or are required to conduct. Specifically, postmarketing studies concerning clinical safety, clinical efficacy, clinical pharmacology, or nonclinical toxicology.  
<sup>b</sup> Sponsors could still be required to report annual status reports to FDA under 21 CFR 314.81(b)(2)(viii) (drugs) or CFR 60.701 (biologics)

216

217           Among the 33 postmarketing commitments for new clinical trials, the median number of words  
218 used to describe the study in publicly available documents was 42 (IQR, 29 to 63), thus providing limited  
219 information. Using only FDA approval letters, there was not enough information to establish use of  
220 randomization, allocation, comparator type, outcome, and number of patients to be enrolled for 13  
221 (39.4%), 20 (60.6%), 27 (81.8%), and 30 (90.9%) of the 33 new clinical trials, respectively (**Additional**  
222 **file 1: supplementary table 1**). In contrast, all 16 postmarketing commitments calling for the submission  
223 of final reports or data for ongoing trials included either a trial name or identifier.

224           Among the 89 postmarketing commitments subject to 506B reporting requirements, 20 (22.5%)  
225 were classified as fulfilled according to FDA Postmarketing Study and Clinical Trial Requirements  
226 Database files. Over two-thirds (59 of 89 (66.3%)) of the 506B studies did not have enough information  
227 in the databases to determine an up to data status; 35 of these had no past or current status (**Additional**  
228 **file 1: supplementary table 2**).

229           Among the 27 postmarketing commitments for new clinical trials subject to 506B reporting  
230 requirements, 12 (44.4%) did not have an up-to-date status and 8 (29.7%) were classified as fulfilled.  
231 When all FDA supplemental letters and drug sponsor data were considered in addition to the databases,  
232 40 (40 of 89, 44.9%) were classified as fulfilled and 38 (42.7%) did not have enough information to  
233 determine an up to date status (**Additional file 1: supplementary table 3**). Publicly available drug  
234 sponsor data were available for 28 506B postmarketing commitments.

### 235 **Registration and Study Characteristics of Clinical Trials**

236           Among the 33 postmarketing commitments for new clinical trials, two did not have enough  
237 information in their postmarketing commitment descriptions to perform ClinicalTrials.gov searches. Of  
238 the 31 remaining commitments, 28 (90.3%) were registered on ClinicalTrials.gov (**Table 3**). The majority  
239 of the 28 registered clinical trials were randomized (26, 92.9%) with double or triple blinding (22, 78.6%)  
240 (**Table 4**). Eighteen (63.0%) trials were placebo controlled and 4 (14.3%) had an active comparator. The  
241 majority of trials included efficacy primary endpoints that were categorized as clinical scales (n=17;  
242 60.7%) and clinical outcomes (n=5; 17.9%); 5 (17.9%) focused on surrogate markers of disease. The

243 median study duration and estimated or actual sample size according to the ClinicalTrials.gov  
 244 registrations were 1.6 months (IQR, 0.9 to 12.0) and 400 patients (IQR, 254 to 529) respectively.  
 245 All 16 postmarketing commitments outlining the completion or submission of results from  
 246 clinical trials were registered on ClinicalTrials.gov (**Table 3**). Of these, 10 (62.5%) were randomized, 6  
 247 (37.5%) were double or triple blind, 6 (37.5%) were placebo controlled, and 4 (25.0%) had an active  
 248 comparator (**Table 4**). The majority of the trials (10, 62.5%) focused on surrogate outcomes. According  
 249 to the ClinicalTrials.gov registrations, median study duration and estimated sample size were 5.6 months  
 250 (IQR, 5.2 to 12.6) and 237 patients (IQR, 373 to 744), respectively.

| <b>Table 3. Registration, results reporting, and publication of postmarketing commitments of new drugs and biologics approved by the Food and Drug Administration between 2009 and 2012</b> |                                                 |            |                                             |                  |                                               |           |                               |
|---------------------------------------------------------------------------------------------------------------------------------------------------------------------------------------------|-------------------------------------------------|------------|---------------------------------------------|------------------|-----------------------------------------------|-----------|-------------------------------|
|                                                                                                                                                                                             | No. (%)                                         |            |                                             |                  |                                               |           |                               |
|                                                                                                                                                                                             | Registration                                    |            | Results reporting                           |                  | Publication <sup>a</sup> or results reporting |           |                               |
| Category                                                                                                                                                                                    | Eligible for registration at ClinicalTrials.gov | Registered | Eligible for results reporting <sup>b</sup> | Results reported | Eligible for publication <sup>c</sup>         | Published | Results reported or published |
| <i>New clinical trials</i>                                                                                                                                                                  | 31                                              | 28 (90.3)  | 23                                          | 22 (95.7)        | 29                                            | 14 (48.3) | 22 (75.9)                     |
| <i>Complete or submit results from clinical trials</i>                                                                                                                                      | 16                                              | 16 (100.0) | 15                                          | 15 (100.0)       | 15                                            | 14 (93.3) | 15 (100.0)                    |
| Total                                                                                                                                                                                       | 49                                              | 44 (89.8)  | 38                                          | 36 (94.7)        | 44                                            | 28 (63.6) | 37 (84.1)                     |

FDAAA = Food and Drug Administration Amendments Act

<sup>a</sup>“Publication” indicates publication in the peer-reviewed literature.

<sup>b</sup>Clinical studies classified as *Completed* or *Terminated* by ClinicalTrials.gov. Among four additional trials that classified as *Active, not recruiting* on ClinicalTrials.gov, one reported results and none were published. One article classified as *Completed* had an “Actual Primary Completion Data” of April 30, 2018. The final rule requires the submission of results information “not later than 1 year after the completion data (referred to as the ‘primary completion date’)”.

<sup>c</sup>The denominator included *Completed* and *Terminated* clinical trials registered on ClinicalTrials.gov. For registered and unregistered clinical trials, we used information provided by FDA or drug sponsors on the status of the postmarketing commitments. We searched for publications for clinical trials classified by the FDA as *Submitted*, *Fulfilled*, or *Released*. We also searched for publications for postmarketing commitments where the last status provided by the FDA was unclear (e.g., last available record: 2013, ongoing).

251

**Table 4. Study characteristics of clinical trials based on ClinicalTrials.gov data**

|                                                      | No. (%)    |              |            |            |          |          |                   |                  |                |          | Median (IQR) <sup>a</sup> |                   |
|------------------------------------------------------|------------|--------------|------------|------------|----------|----------|-------------------|------------------|----------------|----------|---------------------------|-------------------|
|                                                      | Allocation |              |            | Comparator |          |          | Endpoint          |                  |                |          | Estimated Sample Size     | Duration (months) |
| Registered Postmarketing Requirements                | Randomized | Double Blind | Open label | Placebo    | Active   | None     | Surrogate Outcome | Clinical Outcome | Clinical Scale | Safety   |                           |                   |
| New clinical trial (n=28)                            | 26 (92.9)  | 22 (78.6)    | 6 (21.4)   | 18 (64.3)  | 4 (14.3) | 6 (21.4) | 6 (21.4)          | 5 (17.9)         | 17 (60.7)      | 0 (0.0)  | 400 (254 to 529)          | 1.6 (0.9 to 12.0) |
| Complete or submit results from clinical trials (16) | 10 (62.5)  | 6 (37.5)     | 10 (62.5)  | 6 (37.5)   | 4 (25.0) | 6 (37.5) | 10 (62.5)         | 3 (18.8)         | 0 (0.0)        | 3 (18.8) | 237 (373 to 744)          | 5.6 (5.2 to 12.6) |

<sup>a</sup> Registered on ClinicalTrials.gov

252

### 253 Results Reporting and Publication of Clinical Trials

254 Of the 23 postmarketing commitments for new trials classified as completed or terminated  
 255 according to ClinicalTrials.gov, 22 (95.7%) had reported results (**Table 3**). Among the 29 registered or  
 256 unregistered studies for which publication would be expected based on the most recent status provided by  
 257 the FDA, drug sponsors, or on ClinicalTrials.gov, just under half were published in a peer reviewed  
 258 journal (14 of 29 (48.3%)) and approximately three-quarters (22 of 29 (75.9%)) had either reported results  
 259 or were published. The median time from FDA approval to reported results or publication of new trials  
 260 was 65 months (IQR, 47 to 81).

261 Among the 22 trials with reported results or a publication with a “report submission” date  
 262 provided in the FDA approval letters, 18 (81.8%) reported results on ClinicalTrials.gov after the FDA  
 263 scheduled submission deadline (median 13 (IQR, 4 to 24) months afterwards). There were 4 (18.9%) that  
 264 reported results ahead of schedule (median 13 months (IQR, 10 to 16)). All 15 (100%) postmarketing

265 commitments outlining the completion or submission of results from an ongoing study reported results,  
266 and all but one were published (14, 93.3%).

## 267 **Discussion**

268 Just over half of the new drugs and biologics approved by the FDA between 2009-2012 had at  
269 least one postmarketing commitment outlined at the time of approval. These studies, which sponsors  
270 agree to conduct, are not required by a statute or regulations, but may be a potentially important source of  
271 information about drug safety and effectiveness after market approval. However, the vast majority were  
272 not human subjects research intended to gather additional information about the safety, efficacy, or  
273 optimal use of drugs and biologics in patients and were instead focused on product quality control, an  
274 important component of safety. Instead, only 15% were clinical studies, less than one in ten new clinical  
275 trials. While these trials were nearly always registered with reported results on ClinicalTrials.gov,  
276 approximately one-half had not yet been published in peer-reviewed journals and the vast majority  
277 reported results on ClinicalTrials.gov after FDA scheduled submission deadlines. Postmarketing  
278 commitments may offer an opportunity for FDA to work with sponsors to generate important information  
279 about recently approved drugs and biologics after market approval.

280 Our study found that over 80% of the postmarketing commitments were for non-clinical studies,  
281 including chemistry, manufacturing, and controls study commitments. Prior to FDAAA, when the term  
282 “postmarketing commitment” referred to all required, agreed-upon, and voluntary studies conducted by  
283 sponsors after FDA drug approval, 74% of commitments were classified as clinical studies.[21] However,  
284 since 2008, FDA has distinguished between legally required studies and clinical trials (postmarketing  
285 requirements) and studies that “would not meet the statutory purposes” for postmarketing requirements  
286 (postmarketing commitments).[4] Therefore, the low proportion of clinical trials identified as  
287 postmarketing commitments in our sample may not be surprising, considering that confirmatory, safety,  
288 and pediatric clinical trials can be formally required by FDA under the accelerated approval, FDAAA,  
289 and PREA postmarketing requirement authorities.[8, 11] However, postmarketing commitments can still  
290 include clinical trials “in which the primary endpoint is related to further defining efficacy”,[4] and

291 certain clinical efficacy, clinical pharmacology, or nonclinical toxicology studies are subject to reporting  
292 requirements by applicants and the FDA.

293         Using only FDA's Postmarketing Study and Clinical Trial Requirements Database files, we were  
294 unable to identify an up-to-date status for 68% of the postmarketing commitments subject to FDA  
295 reporting requirements under 506B. Drug sponsors are required to provide the FDA with annual status  
296 reports for 506B studies of certain agreed-upon commitments, and FDA must publish annually in the  
297 *Federal Register* a report on the status of these postmarketing study commitments. We found that among  
298 the new clinical trials subject to 506B reporting requirements, just under half had an up-to-date status and  
299 less than one-third were classified as fulfilled. These findings are consistent with a previous study  
300 suggesting that postmarketing requirements often lack a publicly available up-to-date status.[8] However,  
301 we also found that the rates of registration and results reporting on ClinicalTrials.gov and publication in  
302 peer-reviewed journal among postmarketing commitment clinical trials were promising, which was  
303 similar to what has been previously observed among postmarketing requirements.[8]

304         Over 80% of the postmarketing commitments for new clinical trials reported results on  
305 ClinicalTrials.gov after FDA scheduled submission deadlines, which is higher than what has been  
306 previously observed among postmarketing requirements (68.1%).[8] While FDA and drug sponsors can  
307 revise the milestones outlined in the initial approval letters, these findings suggest that there are delays in  
308 study conduct, completion and reporting, which may lead to gaps in the understanding of drug and  
309 biologic safety and effectiveness.

310         Prior studies have focused exclusively on the purposes and transparency of postmarketing  
311 requirements.[8, 22-25] Although postmarketing commitments are primarily for non-clinical studies, our  
312 work suggests that some commitments also generate clinical evidence. In order to further support FDA's  
313 lifecycle evaluation process, FDA and drug sponsors should continue to work closely to identify new  
314 clinical studies or other studies already being conducted, beyond the confirmatory and safety  
315 postmarketing requirement that can be required by FDA. However, greater transparency will be necessary  
316 to ensure that data from postmarketing commitments are able to inform care. For instance, longer and

317 more detailed study descriptions will allow for the identification of specific study design characteristics,  
318 including endpoints, which are necessary to inform clinical practice, as well as more detailed explanations  
319 about the potential long-term knowledge gaps that are addressed. Furthermore, FDA could consider  
320 expanding its recent plans to add ClinicalTrials.gov identifiers to materials for future drug approvals [26,  
321 27] to include postmarketing commitments, especially for those describing ongoing studies with trial  
322 identifiers. Similarly, ClinicalTrials.gov could include a variable specifying whether certain trials are  
323 postmarketing requirements or commitments. This will allow patients, clinicians, and researchers to  
324 locate and identify potential postmarketing studies and their results. In order to ensure that postmarketing  
325 commitment status are publicly identifiable, the FDA should keep all “fulfilled” and “released” 506B  
326 commitments on the Postmarketing Study and Clinical Trial Requirements Database, instead of removing  
327 them after 1 year of fulfillment or completion. Lastly, although postmarketing commitment trails were  
328 often registered with reported results, drug sponsors can play a key role in promoting the dissemination of  
329 postmarket evidence by ensuring that the results of all agreed-upon clinical trials are published in peer-  
330 reviewed journals.

### 331 **Limitations of this study**

332 This study has some limitations. First, by limiting our study to new approvals between 2009 and  
333 2012, we did not identify and classify all postmarketing commitments issued after FDAAA. However, by  
334 focusing on this time period, we allowed for at least four years for completion, results reporting, and  
335 publication of postmarketing commitments. In our sample, the median study duration among clinical  
336 trials was 1.6 months, and only one-quarter of clinical trials had durations longer than 12 months.  
337 Therefore, we are reassured that our study allowed for an adequate amount of follow-up time for studies  
338 to be completed, reported, and published. Second, as previously discussed, our study was designed to rely  
339 on publicly available data sources, which made determining study design characteristics,  
340 ClinicalTrials.gov registrations, and corresponding publications difficult in some cases.[8] Although we  
341 attempted to be comprehensive by using numerous public data sources, we were unable to locate an up-  
342 to-date status for nearly half of the commitments. Therefore, it is possible that a number of commitments



343 classified as “unclear” are actually “fulfilled” and “released” commitments, which are only displayed on  
344 the FDA’s online database for one year after the date of fulfillment or release. Third, we used the  
345 milestone dates outlined in the initial FDA approval letters. However, sponsors can submit revised  
346 schedules and FDA uses the original study schedule to determine study progress.[13] Lastly, we also did  
347 not account for the time that it might take to prepare and publish research. Although additional studies  
348 could be published at a later date, but were not published at the time of our search, we based our decisions  
349 on previous work by our group and others.[8, 28-32]

### 350 **Conclusions**

351 Among 331 postmarketing commitments outlined in approval letters for new drugs and biologics,  
352 the vast majority were for chemistry, manufacturing, controls, and other non-clinical studies. Only 15% of  
353 postmarketing commitments were new or ongoing clinical trials. While nearly half of postmarketing  
354 commitments subject to mandatory reporting requirements under Section 506B did not have a clear up-to-  
355 date progress reported publicly, the majority of clinical trials were registered on ClinicalTrials.gov with  
356 reported results. However, only half of the clinical trials had corresponding publications in peer-reviewed  
357 journals. Opportunities may exist for FDA and drug sponsors to work together to identify additional  
358 postmarketing commitments that support FDA’s lifecycle evaluation process by generating information  
359 about the safety, efficacy, or optimal use of drugs and biologics in patients.

360

361

362

363

364

365

### 366 **List of abbreviations**

367 CI = confidence interval; IQR = Interquartile range; FDA = Food and Drug Administration

368

369 **Declarations**

370 **Ethics approval and consent to participate**

371 This study used publicly available information and did not require ethics approval from the Yale  
372 University School of Medicine Human Research Protection Program.

373 **Consent for publication**

374 Not applicable

375 **Availability of data and material**

376 The datasets used and/or analysed during the current study are available from the corresponding author on  
377 reasonable request ([Joshua.wallach@yale.edu](mailto:Joshua.wallach@yale.edu)).

378 **Competing interests**

379 In the past 36 months, JDW received research support through the Meta Research Innovation Center at  
380 Stanford (METRICS) from the Laura and John Arnold Foundation. JSR received research support  
381 through Yale from Johnson and Johnson to develop methods of clinical trial data sharing, from  
382 Medtronic, Inc. and the Food and Drug Administration (FDA) to develop methods for postmarket  
383 surveillance of medical devices (U01FD004585), from the Centers of Medicare and Medicaid Services  
384 (CMS) to develop and maintain performance measures that are used for public reporting, from the FDA to  
385 establish a Center for Excellence in Regulatory Science and Innovation (CERSI) at Yale University and  
386 the Mayo Clinic (U01FD005938), from the Blue Cross Blue Shield Association to better understand  
387 medical technology evaluation, and from the Agency for Healthcare Research and Quality  
388 (R01HS022882). SSD receives support as a Scholar in the Yale University / Mayo Clinic FDA CERSI.  
389 JEM and JSR receive funding from the Laura and John Arnold Foundation in connection with the Good  
390 Pharma Scorecard.

391 **Funding**

392 This project was conducted as part of the Collaboration for Research Integrity and Transparency (CRIT)  
393 at Yale, funded by the Laura and John Arnold Foundation, which supports JDW and JSR. During the time  
394 of this study, SSD was supported by the Robert Wood Johnson Foundation's Clinical Scholars Program

395 and the Department of Veterans Affairs. These funders played no role in the design of the study, analysis  
396 or interpretation of findings, or drafting the manuscript and did not review or approval the manuscript  
397 prior to submission. The authors assume full responsibility for the accuracy and completeness of the ideas  
398 presented.

#### 399 **Authors' contributions**

400 JDW, SSD, and JSR were responsible for the conception and design of this work. JDW and ATL were  
401 responsible for the data abstraction. Statistical analyses were performed by JDW. JDW drafted the  
402 manuscript, which was revised by JSR. All authors participated in the analysis and interpretation of the  
403 data and critically revised the manuscript for important intellectual content. All authors approved the final  
404 version of the manuscript. JSR provided supervision.

#### 405 **Consent for publication**

406 Not applicable.

407

408

409

410

411

412

413

414

415

416

417

418

419

420

421

422 **Additional files**

423 **Additional file 1:** Supplementary tables and boxes (.PDF 11 KB)

424

425

426

427

428

429

430

431

432

433

434

435

436

437

438

439

440

441

442

443

444

445

446

447

448

## REFERENCES

449

450 1. Wallach JD, Ross JS, Naci H: **The US Food and Drug Administration's expedited approval**  
451 **programs: Addressing premarket flexibility with enhanced postmarket evidence generation.**

452 *Clin Trials* 2018, **15**(3):243-246.

453 2. Psaty BM, Meslin EM, Breckenridge A: **A lifecycle approach to the evaluation of FDA**

454 **approval methods and regulatory actions: opportunities provided by a new IOM report.**

455 *JAMA* 2012, **307**(23):2491-2492.

456 3. U.S. Food And Drug Administration (FDA). **Postmarket drug and biologic safety evaluations.**

457 [http://www.fda.gov/Drugs/GuidanceComplianceRegulatoryInformation/Surveillance/ucm204091.](http://www.fda.gov/Drugs/GuidanceComplianceRegulatoryInformation/Surveillance/ucm204091.htm)  
458 [htm](http://www.fda.gov/Drugs/GuidanceComplianceRegulatoryInformation/Surveillance/ucm204091.htm). Accessed 10 Oct 2018. In.

459 4. U.S. Food and Drug Administration (FDA). **Guidance for Industry: Postmarketing Studies**  
460 **and Clinical Trials — Implementation of Section 505(o)(3) of the Federal Food, Drug, and**  
461 **Cosmetic Act.** April 2011.

462 [https://www.fda.gov/downloads/Drugs/GuidanceComplianceRegulatoryInformation/Guidances/U](https://www.fda.gov/downloads/Drugs/GuidanceComplianceRegulatoryInformation/Guidances/UCM172001.pdf)  
463 [CM172001.pdf](https://www.fda.gov/downloads/Drugs/GuidanceComplianceRegulatoryInformation/Guidances/UCM172001.pdf). Accessed 10 Oct 2010. In.

464 5. U.S. Food and Drug Administration (FDA). **Postmarketing Requirements and Commitments:**  
465 **Introduction.** [https://www.fda.gov/Drugs/GuidanceComplianceRegulatoryInformation/Post-](https://www.fda.gov/Drugs/GuidanceComplianceRegulatoryInformation/Post-marketingPhaseIVCommitments/default.htm)  
466 [marketingPhaseIVCommitments/default.htm](https://www.fda.gov/Drugs/GuidanceComplianceRegulatoryInformation/Post-marketingPhaseIVCommitments/default.htm). Updated January 12, 2016. Accessed 10 Oct 2018.

467 In.

468 6. Office of Inspector General Department of Health and Human Services. **FDA's Monitoring of**  
469 **Postmarketing Study Commitments.**

470 <http://www.elsevierbi.com/~media/Images/Publications/Archive/The Pink>

471 [Sheet/68/029/00680290012/060717\\_oig\\_report\\_postmarketing\\_study\\_commitments.pdf](http://www.elsevierbi.com/~media/Images/Publications/Archive/The Pink Sheet/68/029/00680290012/060717_oig_report_postmarketing_study_commitments.pdf). **June**

472 2006. Accessed 10 Oct 2018. In.

- 473 7. U.S. Food and Drug Administration (FDA). **Guidance for Industry: Reports on the Status of**  
474 **Postmarketing Study Commitments — Implementation of Section 130 of the Food and**  
475 **Drug Administration Modernization Act of 1997. February 2006.**  
476 <https://www.fda.gov/downloads/Drugs/GuidanceComplianceRegulatoryInformation/Guidances/UCM077374.pdf>. Accessed 10 Oct 2018. In.
- 478 8. Wallach JD, Egilman AC, Dhruva SS, McCarthy ME, Miller JE, Woloshin S, Schwartz LM, Ross  
479 JS: **Postmarket studies required by the US Food and Drug Administration for new drugs**  
480 **and biologics approved between 2009 and 2012: cross sectional analysis.** *BMJ* 2018,  
481 **361:k2031.**
- 482 9. Woloshin S, Schwartz LM, White B, Moore TJ: **The Fate of FDA Postapproval Studies.** *N Engl*  
483 *J Med* 2017, **377(12):1114-1117.**
- 484 10. Cruz ML, Xu J, Kashoki M, Lurie P: **Publication and Reporting of the Results of Postmarket**  
485 **Studies for Drugs Required by the US Food and Drug Administration, 2009 to 2013.** *JAMA*  
486 *Intern Med* 2017, **177(8):1207-1210.**
- 487 11. Department of Health and Human Services Office of Inspector General. **July 2016. FDA is**  
488 **Issuing More Postmarketing Requirements, but Challenges with Oversight**  
489 **Persist.** <https://oig.hhs.gov/oei/reports/oei-01-14-00390.pdf>. Accessed 10 Oct 2018. In.
- 490 12. U.S. Food and Drug Administration (FDA). **Applications for Food and Drug Administration**  
491 **Approval to Market a New Drug: Accelerated Approval of New Drugs for Serious or Life-**  
492 **Threatening Illnesses, 21 CFR § 314h (2012).** FDA  
493 website. <http://www.accessdata.fda.gov/scripts/cdrh/cfdocs/cfrcfr/CFRSearch.cfm?CFRPart=314>  
494 . Accessed 10 Oct 2018. In.
- 495 13. U.S. Food and Drug Administration (FDA). **Standard Operating Procedures and Policy**  
496 **(SOPP) 8415: Procedures for Developing Postmarketing Requirements and Commitments**  
497 **Version 3.**

- 498 [\[https://www.fda.gov/downloads/BiologicsBloodVaccines/GuidanceComplianceRegulatoryInfor](https://www.fda.gov/downloads/BiologicsBloodVaccines/GuidanceComplianceRegulatoryInformation/ProceduresSOPPs/UCM429572.pdf)  
499 [mation/ProceduresSOPPs/UCM429572.pdf\]](https://www.fda.gov/downloads/BiologicsBloodVaccines/GuidanceComplianceRegulatoryInformation/ProceduresSOPPs/UCM429572.pdf). Access 10 Oct 2018.
- 500 14. Downing NS, Aminawung JA, Shah ND, Krumholz HM, Ross JS: **Clinical trial evidence**  
501 **supporting FDA approval of novel therapeutic agents, 2005-2012.** *JAMA* 2014, **311**(4):368-  
502 377.
- 503 15. U.S. Food and Drug Administration (FDA). **Drugs@FDA: FDA Approved Drug Products.**  
504 **FDA website.** <http://www.accessdata.fda.gov/scripts/cder/drugsatfda/>. Accessed 10 Oct 2018. In.
- 505 16. U.S. Food and Drug Administration (FDA). **Priority review.**  
506 <https://www.fda.gov/ForPatients/Approvals/Fast/ucm405405.htm>. Updated September 15, 2014.  
507 10 Oct 2018. In.
- 508 17. World Health Organization (WHO) Collaborating Center for Drug Statistics Methodology.  
509 **ATC/DDD index 2017.** [https://www.whocc.no/atc\\_ddd\\_index/](https://www.whocc.no/atc_ddd_index/). In.
- 510 18. U.S. Food and Drug Administration (FDA). **Postmarket Requirements and Commitments.**  
511 **FDA website.** <http://www.accessdata.fda.gov/scripts/cder/pmc/index.cfm>. Accessed 10 Oct 2018.  
512 In.
- 513 19. ClinicalTrials.gov. **FDAAA 801 requirements.** <http://clinicaltrials.gov/ct2/manage-recs/fdaaa ->  
514 [/WhichTrialsMustBeRegistered](http://clinicaltrials.gov/ct2/manage-recs/fdaaa -/WhichTrialsMustBeRegistered). In.
- 515 20. Chen R, Desai NR, Ross JS, Zhang W, Chau KH, Wayda B, Murugiah K, Lu DY, Mittal A,  
516 Krumholz HM: **Publication and reporting of clinical trial results: cross sectional analysis**  
517 **across academic medical centers.** *BMJ* 2016, **352**:i637.
- 518 21. Department of Health and Human Services Office of Inspector General. June 2006. **FDA's**  
519 **Monitoring of Postmarketing Study Commitments.** [https://oig.hhs.gov/oei/reports/oei-01-04-](https://oig.hhs.gov/oei/reports/oei-01-04-00390.pdf)  
520 [00390.pdf](https://oig.hhs.gov/oei/reports/oei-01-04-00390.pdf). Accessed 10 Oct 2018. In.
- 521 22. Pease AM, Krumholz HM, Downing NS, Aminawung JA, Shah ND, Ross JS: **Postapproval**  
522 **studies of drugs initially approved by the FDA on the basis of limited evidence: systematic**  
523 **review.** *BMJ* 2017, **357**:j1680.

- 524 23. Naci H, Smalley KR, Kesselheim AS: **Characteristics of Preapproval and Postapproval**  
525 **Studies for Drugs Granted Accelerated Approval by the US Food and Drug Administration.**  
526 *JAMA* 2017, **318**(7):626-636.
- 527 24. Naci H, Wouters OJ, Gupta R, Ioannidis JPA: **Timing and Characteristics of Cumulative**  
528 **Evidence Available on Novel Therapeutic Agents Receiving Food and Drug Administration**  
529 **Accelerated Approval.** *Milbank Q* 2017, **95**(2):261-290.
- 530 25. Beaver JA, Howie LJ, Pelosof L, Kim T, Liu J, Goldberg KB, Sridhara R, Blumenthal GM,  
531 Farrell AT, Keegan P *et al*: **A 25-Year Experience of US Food and Drug Administration**  
532 **Accelerated Approval of Malignant Hematology and Oncology Drugs and Biologics: A**  
533 **Review.** *JAMA Oncol* 2018.
- 534 26. Sharfstein JM, Stebbins M: **Enhancing Transparency at the US Food and Drug**  
535 **Administration: Moving Beyond the 21st Century Cures Act.** *JAMA* 2017, **317**(16):1621-  
536 1622.
- 537 27. U.S. Food and Drug Administration (FDA) Statement. **FDA Commissioner Scott Gottlieb,**  
538 **M.D., on new steps FDA is taking to enhance transparency of clinical trial information to**  
539 **support innovation and scientific inquiry related to new drugs.** 16 Jan 2018.  
540 <https://www.fda.gov/NewsEvents/Newsroom/PressAnnouncements/ucm592566.htm>. Accessed  
541 10 Oct 2018. In.
- 542 28. Ross JS, Mulvey GK, Hines EM, Nissen SE, Krumholz HM: **Trial publication after**  
543 **registration in ClinicalTrials.gov: a cross-sectional analysis.** *PLoS Med* 2009, **6**(9):e1000144.
- 544 29. Ross JS, Tse T, Zarin DA, Xu H, Zhou L, Krumholz HM: **Publication of NIH funded trials**  
545 **registered in ClinicalTrials.gov: cross sectional analysis.** *BMJ* 2012, **344**:d7292.
- 546 30. Anderson ML, Chiswell K, Peterson ED, Tasneem A, Topping J, Califf RM: **Compliance with**  
547 **results reporting at ClinicalTrials.gov.** *N Engl J Med* 2015, **372**(11):1031-1039.
- 548 31. Prayle AP, Hurley MN, Smyth AR: **Compliance with mandatory reporting of clinical trial**  
549 **results on ClinicalTrials.gov: cross sectional study.** *BMJ* 2012, **344**:d7373.



- 550 32. Stockmann C, Ross JS, Sherwin CMT, Reilly CA, McDowell B, Fassl B, Nkoy F, Maloney CG,  
551 Spigarelli MG: **Rate of asthma trial outcomes reporting on ClinicalTrials.gov and in the**  
552 **published literature.** *J Allergy Clin Immunol* 2014, **134**(6):1443-1446.  
553
